# Supplementary material for: Strong metal–molecular support interaction (SMMSI): Amine-functionalized gold nanoparticles encapsulated in silica nanospheres highly active for catalytic decomposition of formic acid
Source: Royal Society of Chemistry journal article supplement (doi:10.1039/c2jm31309j), 2012-01-01
Supplement: c2jm31309j.pdf [file c2jm31309j.pdf]

## Electronic Supplementary Information

### **Amine-fleshed gold nanoparticles encapsulated in silica nanospheres highly active for catalytic decomposition of formic acid**

**Mahendra Yadav,<sup>a</sup> Tomoki Akita,<sup>a</sup> Nobuko Tsumori,<sup>a,b</sup> and Qiang Xu<sup>a\*</sup>**

*<sup>a</sup> National Institute of Advanced Industrial Science and Technology (AIST), Ikeda, Osaka 563-8577, Japan*

*Fax: +81 72 751 9629; Tel: +81 72 751 9562 ; E-mail : q.xu@aist.go.jp*

*<sup>b</sup> Toyama National College of Technology, 13, Hongo-machi, Toyama, 939-8630, Japan*

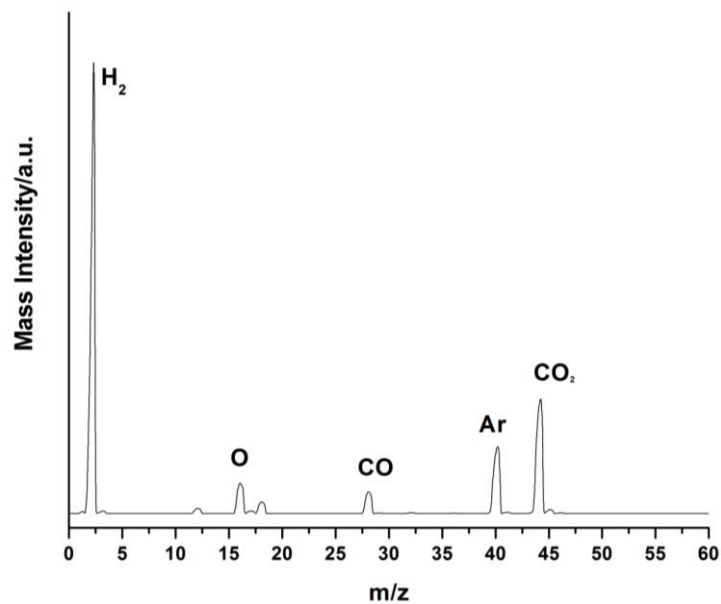

**Fig. S1.** Mass spectral profile for physical mixture of H<sub>2</sub> and CO<sub>2</sub> (1:1) as a reference gas sample.

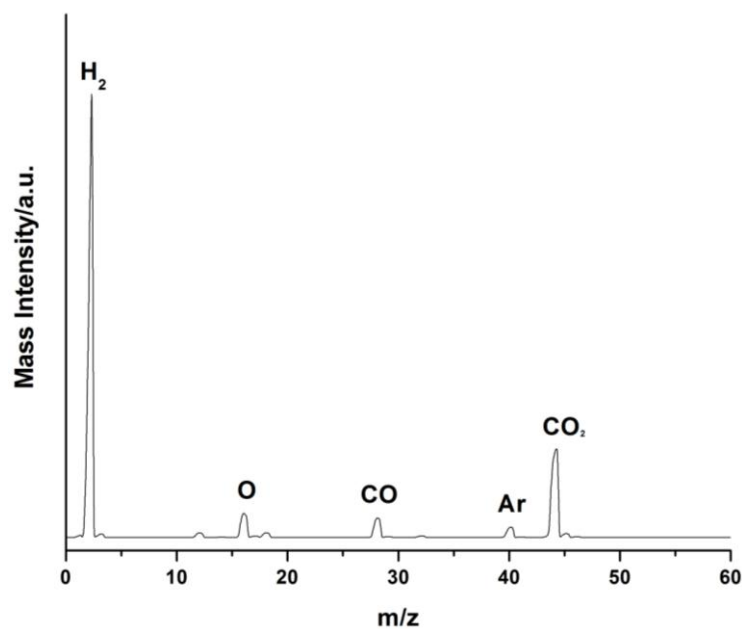

**Fig. S2.** Mass spectral profile of the released gas from the aqueous solution (1.0 mL) of formic acid (3.0 M) and sodium formate (1.0 M) in the presence of Au@SiO<sub>2</sub>-AP catalyst (60 mg) at 90°C.

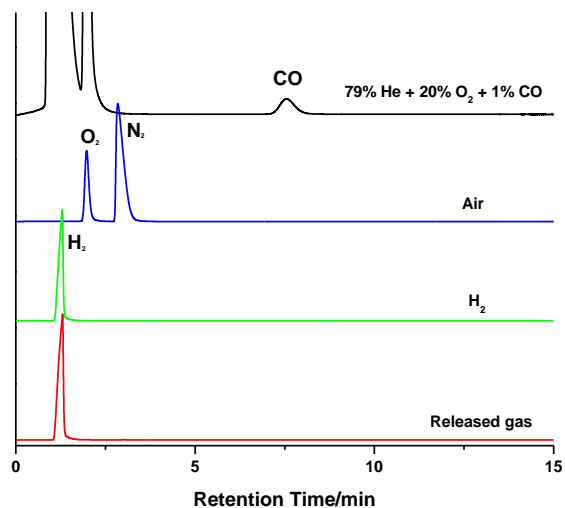

**Fig. S3.** Gas chromatograms of H<sub>2</sub>, air and CO as reference gases and the released gas from the aqueous solution (1.0 mL) of formic acid (3.0 M) and sodium formate (1.0 M) in the presence of Au@SiO<sub>2</sub>\_AP catalyst (60 mg) at 90°C, showing the presence of H<sub>2</sub> and absence of CO in the generated gas.

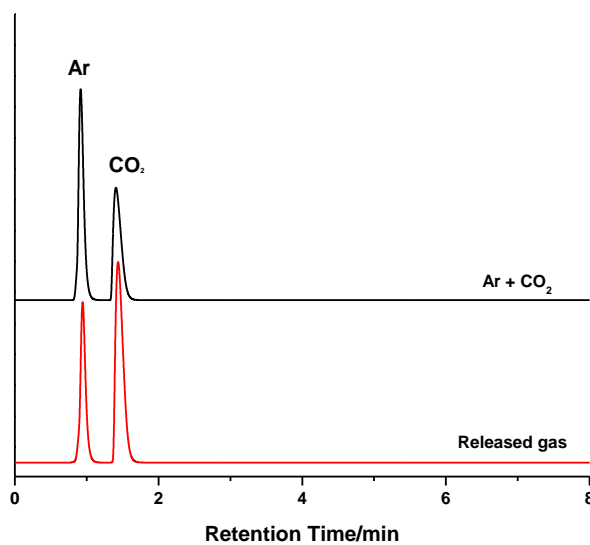

**Fig. S4.** Gas chromatograms of generated gas from the aqueous solution (1.0 mL) of formic acid (3.0 M) and sodium formate (1.0 M) in the presence of Au@SiO<sub>2</sub>\_AP catalyst (60 mg) at 90°C, showing the presence of CO<sub>2</sub> in the generated gas.

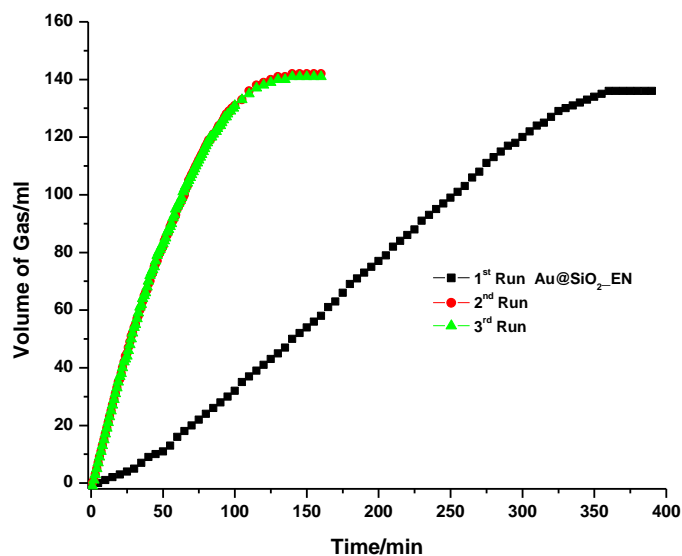

**Fig. S5.** Time-course plots for hydrogen generation from the aqueous solution (1.0 mL) of formic acid (3.0 M) and sodium formate (1.0 M) in the presence of Au@SiO<sub>2</sub>\_EN catalyst (60 mg) at 90°C.

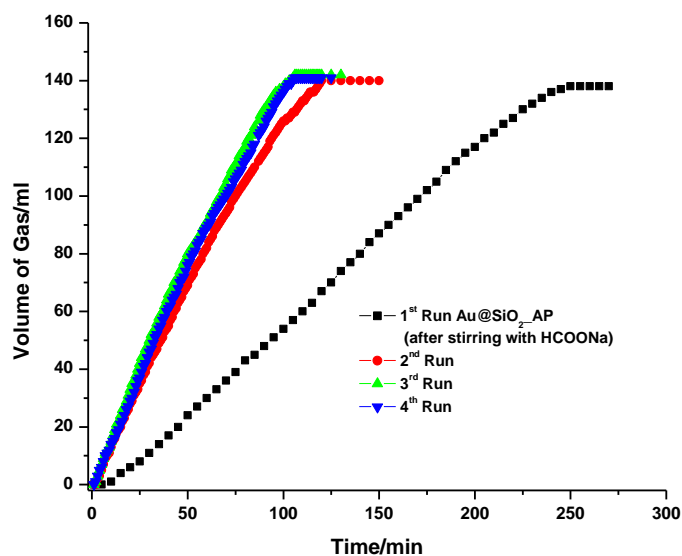

**Fig. S6.** Time-course plots for hydrogen generation from the aqueous solution of formic acid (3.0 M) in the presence of Au@SiO<sub>2</sub>\_AP (60 mg) after stirring with the aqueous solution (1.0 mL) of sodium formate (1.0 M) for 240 min at 90°C.

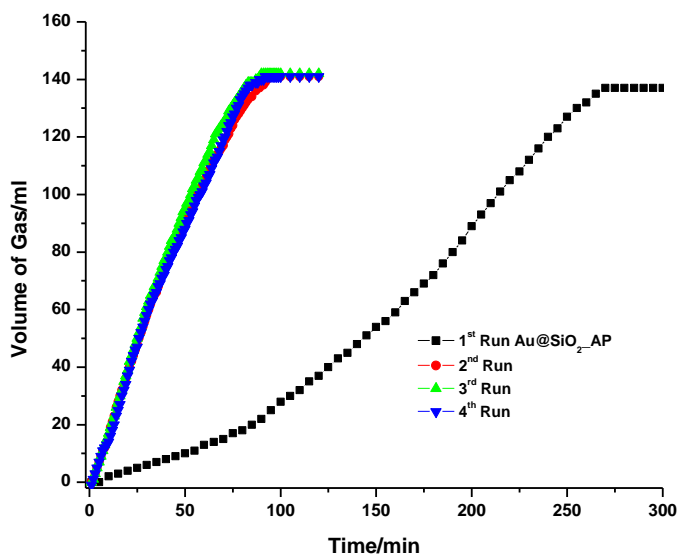

**Fig. S7.** Time-course plots for hydrogen generation from the aqueous solution (1.0 mL) of formic acid (3.0 M) in the presence of Au@SiO<sub>2</sub>-AP catalyst (60 mg) at 90°C.

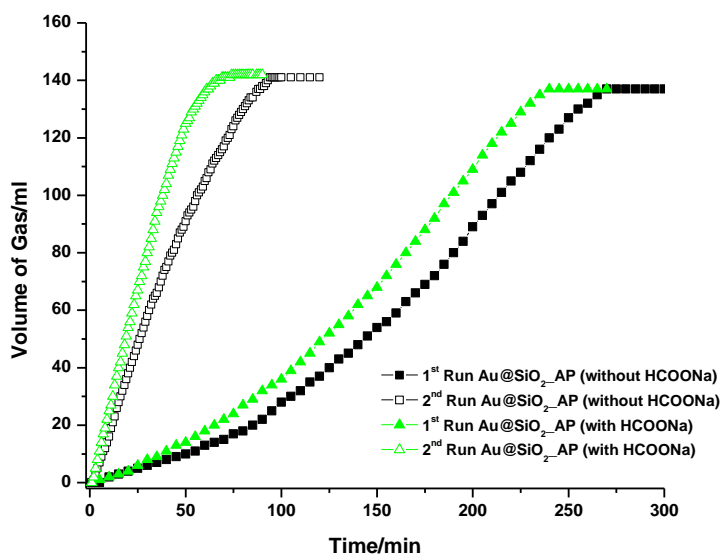

**Fig. S8.** Time-course plots for hydrogen generation from the aqueous solution (1.0 mL) of formic acid (3.0 M) in the presence of Au@SiO<sub>2</sub>-AP (60 mg) with and without sodium formate (1.0 M).

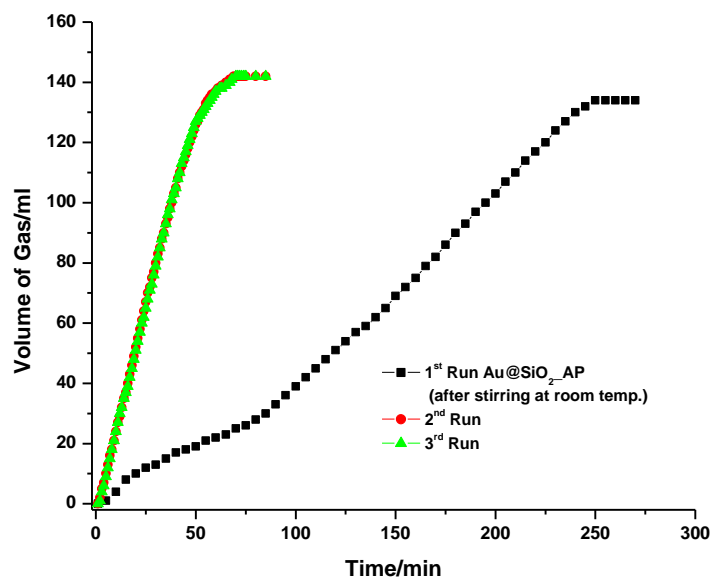

**Fig. S9.** Time-course plots for hydrogen generation from the aqueous solution (1.0 mL) of formic acid (3.0 M) and sodium formate (1.0 M) in the presence of Au@SiO<sub>2</sub>-AP catalyst (60 mg) after stirring for 240 min at room temperature.

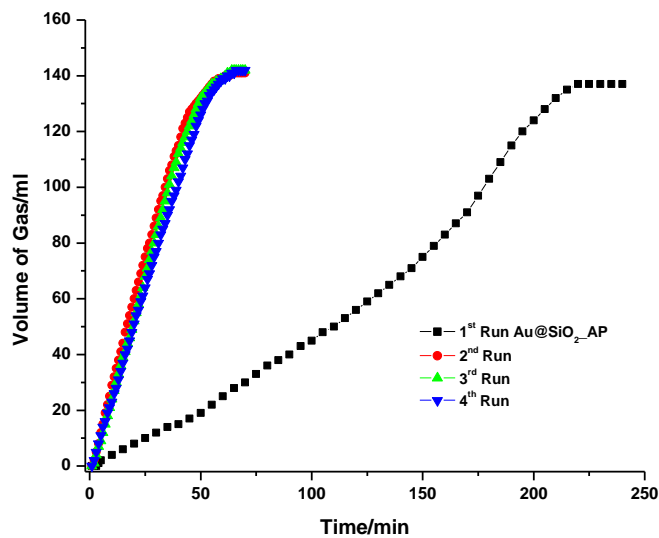

**Fig. S10.** Time-course plots for hydrogen generation from the aqueous solution (1.0 mL) of formic acid (3.0 M) and sodium formate (1.0 M) in the presence of Au@SiO<sub>2</sub>-AP catalyst (prepared by using hydrazine as the reducing agent) (60 mg).

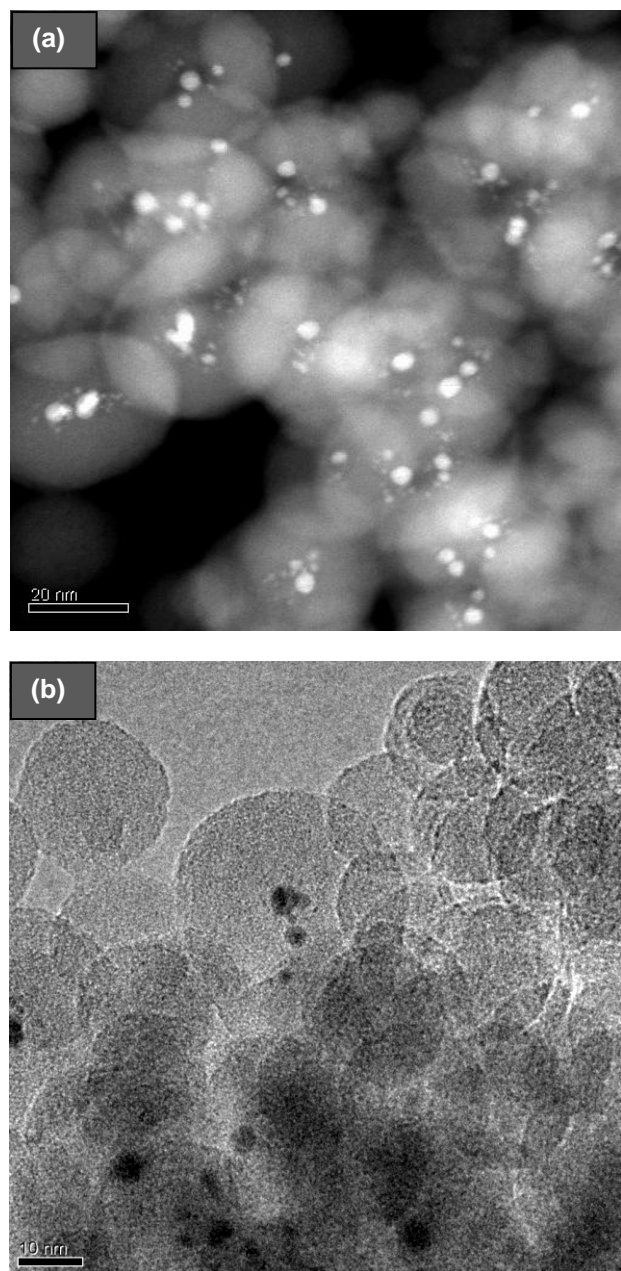

**Fig. S11.** Representative HAADF-STEM image (a) and TEM image (b) of Au@SiO<sub>2</sub> before catalytic reaction.

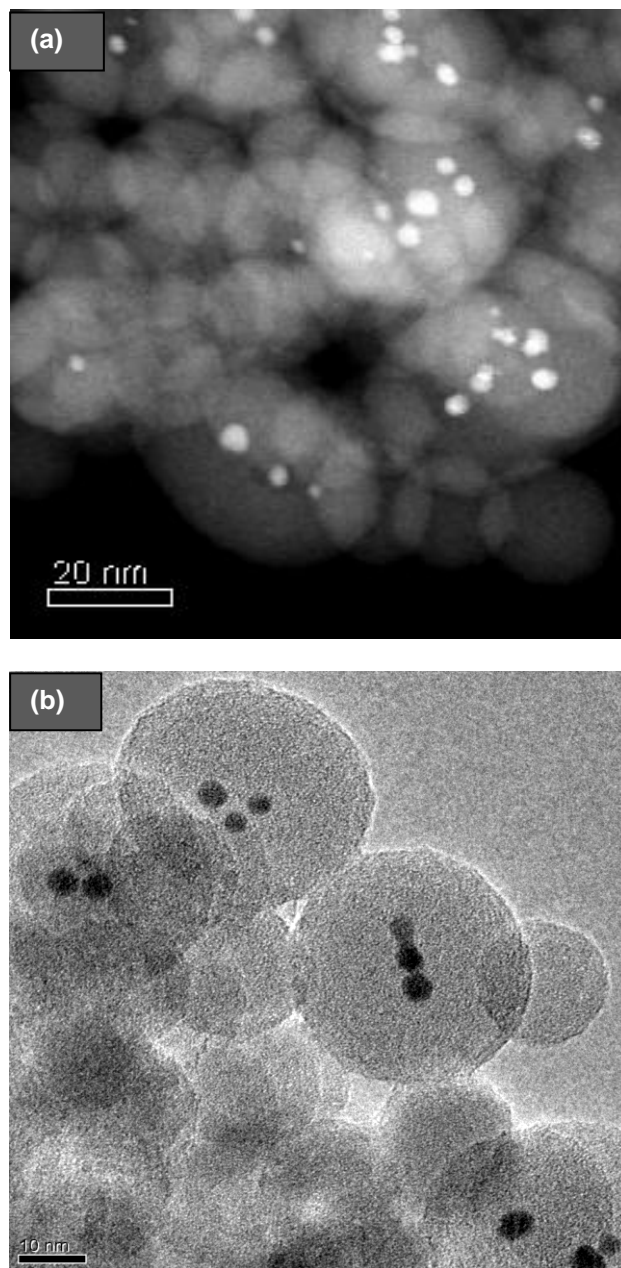

**Fig. S12.** Representative HAADF-STEM image (a) and TEM image (b) of Au@SiO<sub>2</sub> after catalytic reaction.



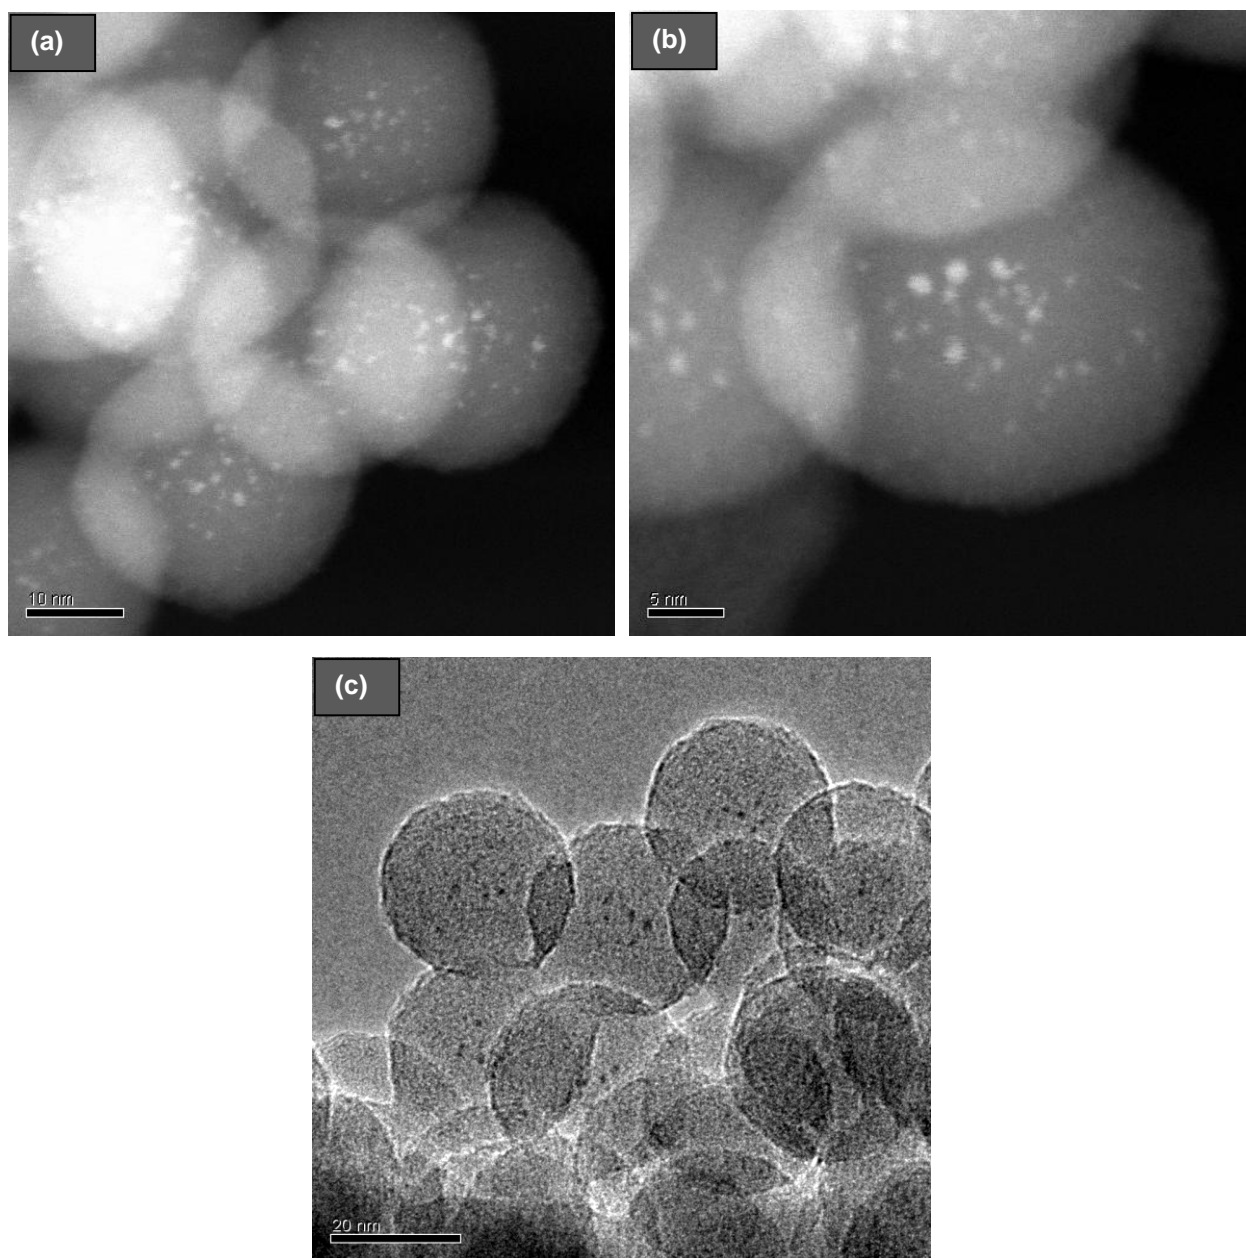

**Fig. S13.** Representative HAADF-STEM images (a,b) and TEM image (c) of Au@SiO<sub>2</sub>\_EN before catalytic reaction.

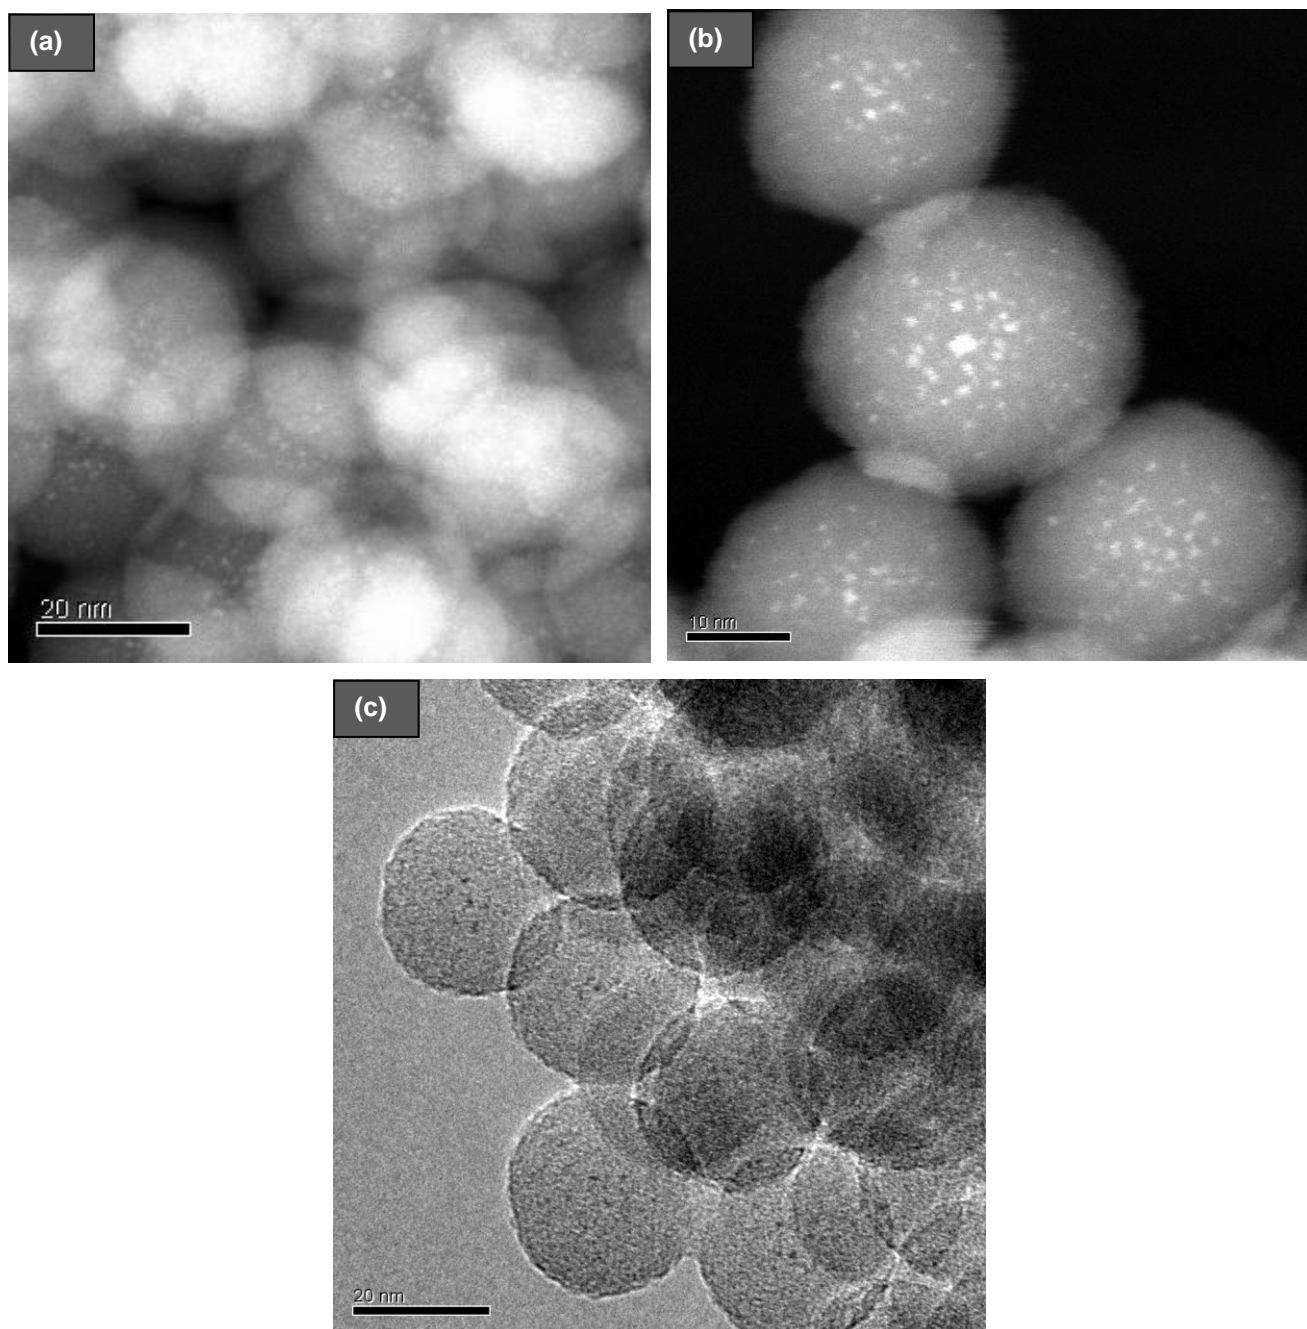

**Fig. S14.** Representative HAADF-STEM images (a,b) and TEM image (c) of Au@SiO<sub>2</sub>\_EN after catalytic reaction.

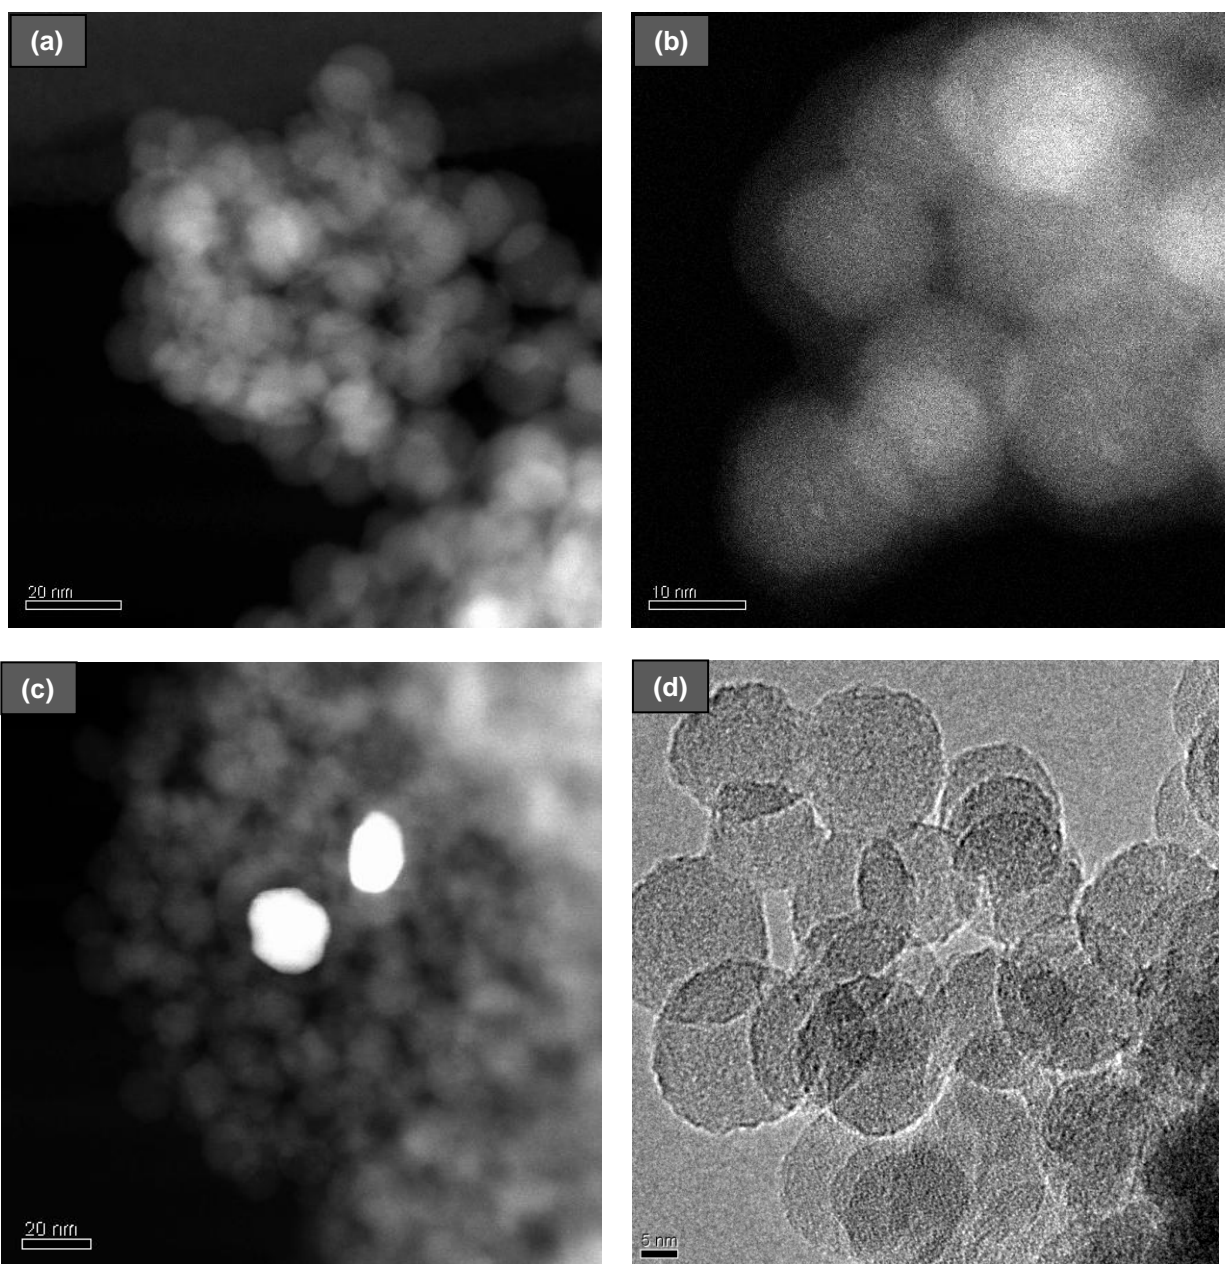

**Fig. S15.** Representative HAADF-STEM images (a-c) and TEM image (d) of Au@SiO<sub>2</sub>-AP before catalytic reaction.

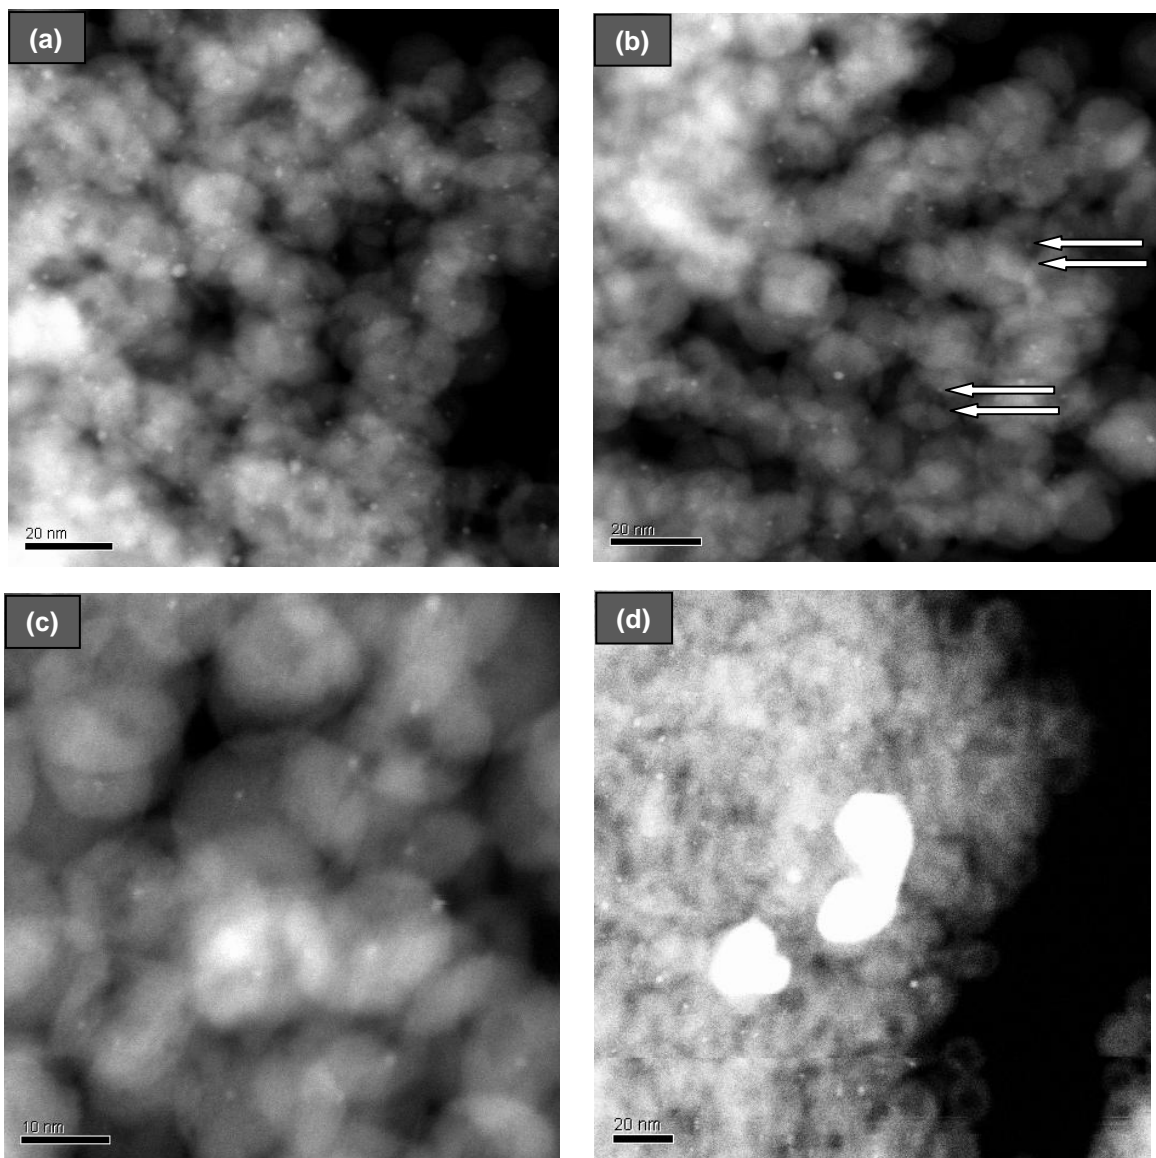

**Fig. S16.** Representative HAADF-STEM images (a-d) of Au@SiO<sub>2</sub>-AP after catalytic reaction.

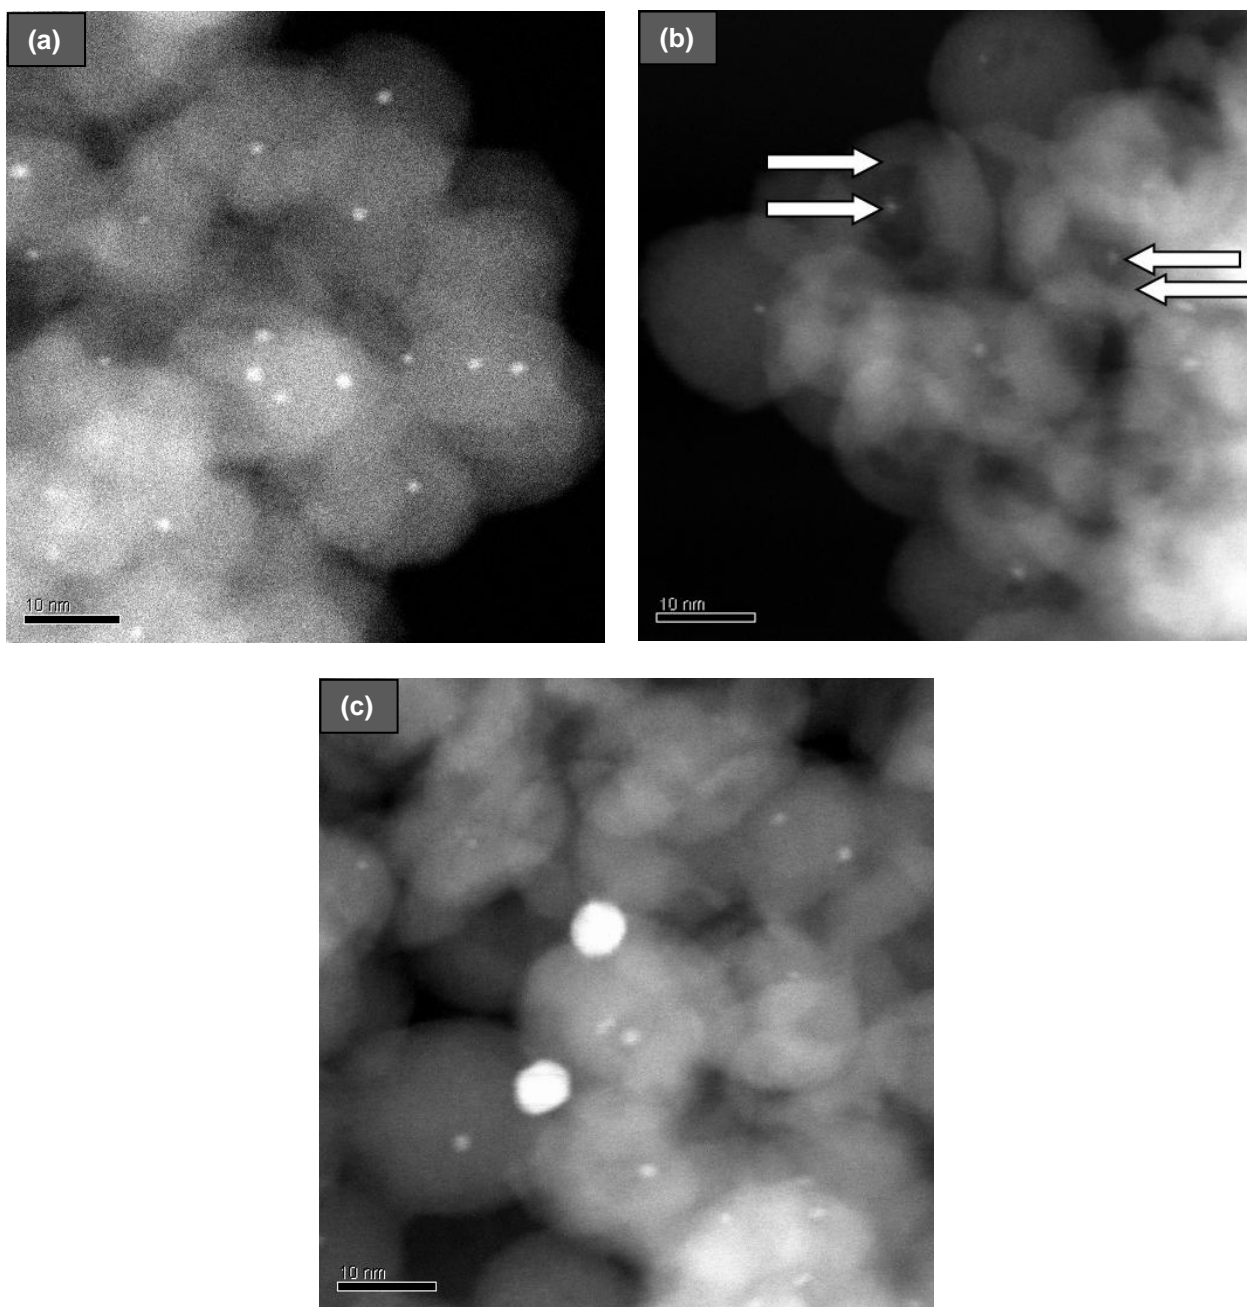

**Fig. S17.** Representative HAADF-STEM images (a-c) of Au@SiO<sub>2</sub>-AP-C before catalytic reaction.

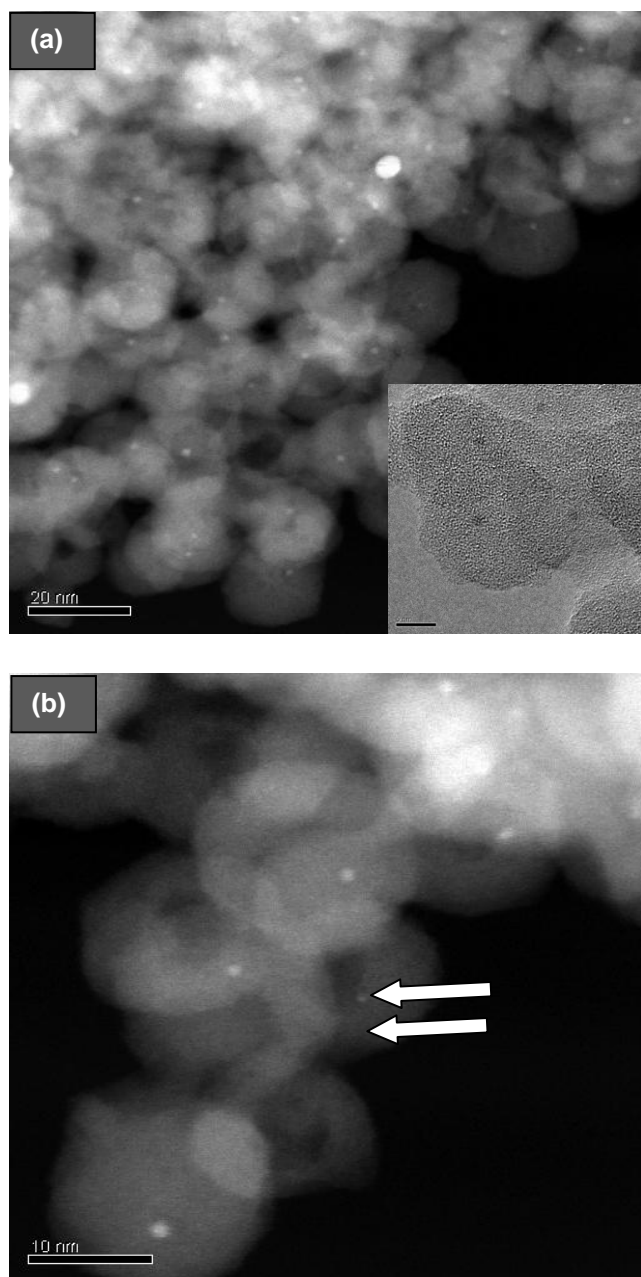

**Fig. S18.** Representative HAADF-STEM images (a,b) of Au@SiO<sub>2</sub>-AP-C after catalytic reaction (inset showing TEM image).

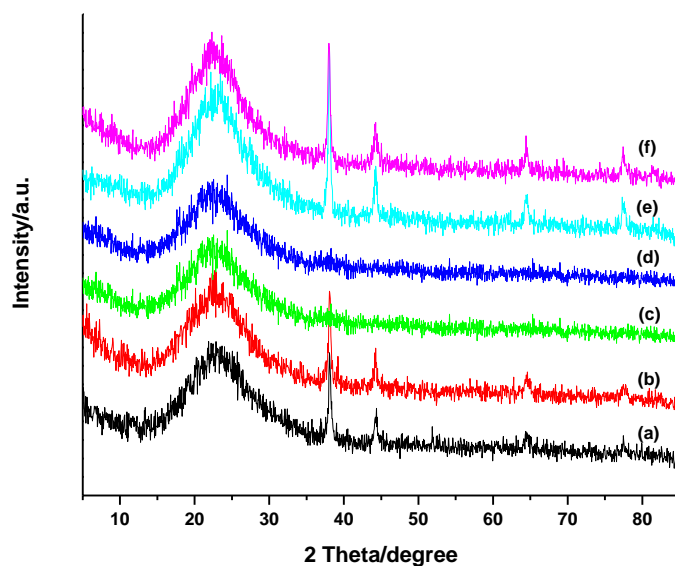

**Fig. S19.** Powder XRD profiles for Au@SiO<sub>2</sub> (a) before and (b) after catalysis, Au@SiO<sub>2</sub>\_EN (c) before and (d) after catalysis, and Au@SiO<sub>2</sub>\_AP (e) before and (f) after catalysis.

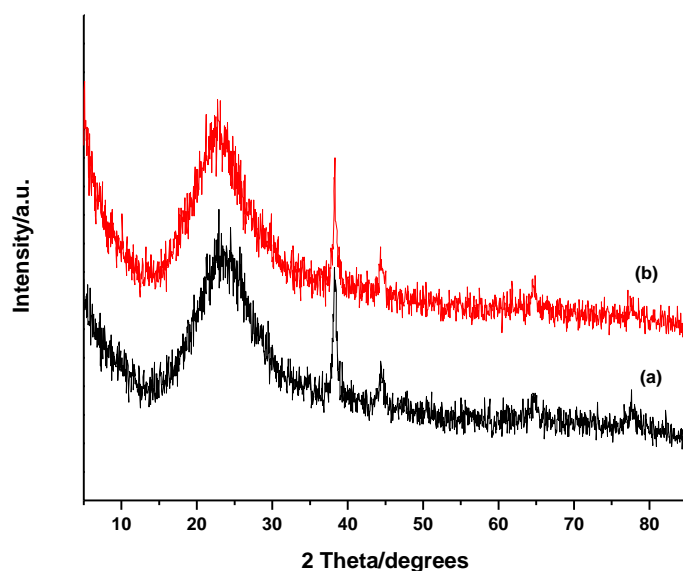

**Fig. S20.** Powder XRD profiles for Au@SiO<sub>2</sub>\_AP catalyst (prepared by using hydrazine as the reducing agent) (a) before and (b) after catalysis.

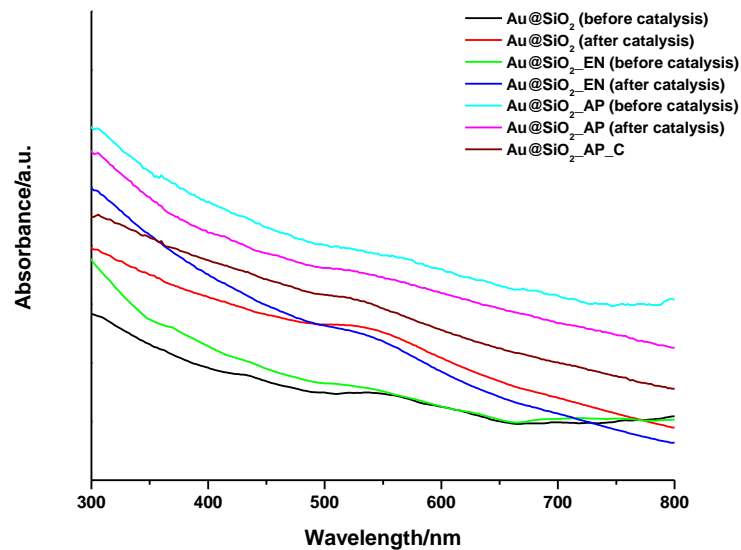

**Fig. S21.** UV-vis absorption spectra of Au@SiO<sub>2</sub>, Au@SiO<sub>2</sub>\_EN, Au@SiO<sub>2</sub>\_AP, and Au@SiO<sub>2</sub>\_APW\_C.

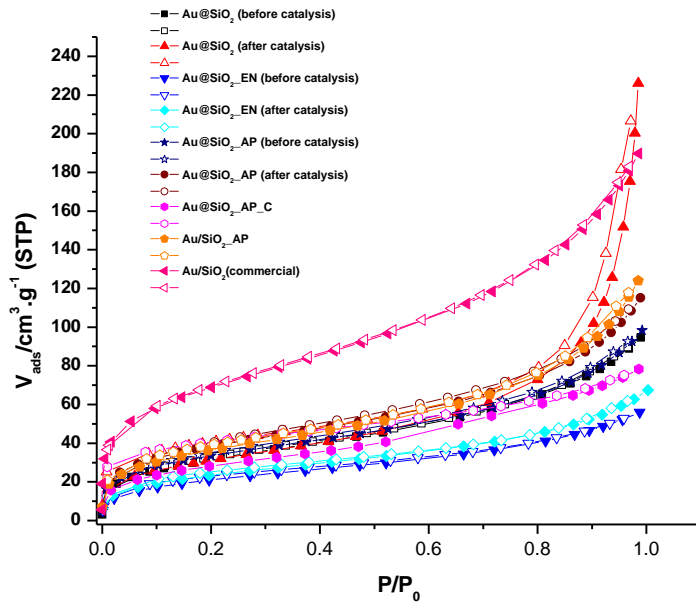

**Fig. S22.** Nitrogen adsorption isotherms of Au@SiO<sub>2</sub>, Au@SiO<sub>2</sub>\_EN, Au@SiO<sub>2</sub>\_AP, Au@SiO<sub>2</sub>\_APW\_C, Au/SiO<sub>2</sub>\_AP, and Au/SiO<sub>2</sub> (commercial) at 77 K.
